# Supplementary material for: Tracking the movement of discrete gating charges in a voltage-gated potassium channel
Source: eLife. 2021 Nov 15;10:e58148. doi: 10.7554/eLife.58148 (PMC8635975; doi:10.7554/eLife.58148)
Supplement: Figure 2—source data 1. [file elife-58148-fig2-data1.xlsx]

## Sheet: Figure 2
R1C QVs	Charge (normalized)
	R1C-qBBr			R1C
Voltage (mV)	mean	SEM	n	mean	SEM	n
-160	0.202	0.0936583	3
-140	0.00713	0.00712208	3	0.17	0.0971183	4
-120	0.138	0.109164	4	0.05	0.0264313	4
-100	0.181	0.0950195	4	0.1	0.0445984	4
-80	0.315	0.108633	4	0.28	0.0409631	4
-60	0.445	0.0747223	4	0.59	0.0165494	4
-40	0.634	0.0631558	4	0.84	0.0138759	4
-20	0.804	0.0593658	4	0.96	0.00601438	4
0	0.919	0.0474757	4	0.99	0.00472356	4
20	0.96	0.0204485	4	0.93	0.0229024	4
40	0.81	0.0886635	4	0.76	0.0585556	4
R2C QVs	Charge (normalized)
	R2C-qBBr			R2C
Voltage (mV)	mean	SEM	n	mean	SEM	n
-160	0.0112242	0.00427354	3	0.02	0.0219	5
-140	0.0337058	0.0268079	3	0.1	0.0269	5
-120	0.126305	0.0366842	3	0.23	0.0327	5
-100	0.235462	0.0425896	3	0.35	0.0273	5
-80	0.352275	0.0448732	3	0.44	0.0309	5
-60	0.477626	0.0400422	3	0.5	0.0347	5
-40	0.604909	0.0331999	3	0.55	0.0409	5
-20	0.717932	0.0337538	3	0.66	0.052	5
0	0.838577	0.037734	3	0.85	0.0505	5
20	0.933976	0.0399482	3	0.95	0.0408	5
40	0.959861	0.0239987	3	0.91	0.0417	5
Sh WF QV	Charge (normalized)
	Sh WF
Voltage (mV)	mean	SEM	n
-120	0.04	0.0368704	4
-100	0.05	0.0165062	4
-80	0.18	0.0403297	4
-60	0.43	0.0295276	4
-40	0.97	0.0191309	4
-20	0.99	0.00948418	4
0	0.94	0.0281747	4
