# Supplementary material for: Tracking the movement of discrete gating charges in a voltage-gated potassium channel
Source: eLife. 2021 Nov 15;10:e58148. doi: 10.7554/eLife.58148 (PMC8635975; doi:10.7554/eLife.58148)
Supplement: Figure 3—source data 1. [file elife-58148-fig3-data1.xlsx]

## Sheet: Figure 3
R1C-qBBr:W454A;E247W	Fluorescence (normalized)					Tau (Single exponential fit to fluorescence) (ms)
Voltage (mV)	mean	SEM	n		Voltage (mV)	mean	SEM	n
-160	0.0180942	0.01645	4
-120	0.0629686	0.0110403	4
-80	0.0955098	0.0204866	4		-80	8.72137	0.583119	3
-40	0.164295	0.0439349	4		-40	13.0502	4.68115	3
0	0.444	0.0544761	4		0	12.2527	2.33415	3
40	0.724002	0.0344365	4		40	7.93726	1.17331	3
80	1	0	4		80	5.15177	0.952718	3
