# Supplementary material for: Tracking the movement of discrete gating charges in a voltage-gated potassium channel
Source: eLife. 2021 Nov 15;10:e58148. doi: 10.7554/eLife.58148 (PMC8635975; doi:10.7554/eLife.58148)
Supplement: Figure 6—figure supplement 1—source data 1. [file elife-58148-fig6-figsupp1-data1.xlsx]

## Sheet: Figure 6-supplement 1
R2C-qBBr:F244W	Charge (normalized)						Fluorescence (normalized)								Tau (single exponential fit to fluorescence) (ms)
	Activation			Deactivation			Activation			Deactivation					Deactivation			Activation
Voltage (mV)	mean	SEM	n	mean	SEM	n	mean	SEM	n	mean	SEM	n		Voltage (mV)	mean	SEM	n	mean	SEM	n
-160	0.0986964	0.0351345	4	0.246433	0.0666473	4				0.0733387	0.0436575	4		-160	28.7833	6.45561	6
-120	0.00180648	0.00180648	4	0	0	4	0.00524587	0.00524587	4	0.173439	0.126002	4		-120	37.3833	7.43633	6
-80	0.0122208	0.0122208	4	0.280726	0.0447394	4	0.0567447	0.00961906	4	0.345959	0.122936	4		-80	42.25	6.68116	6
-40	0.0899787	0.023655	4	0.621092	0.058675	4	0.267676	0.0260235	4	0.485824	0.130487	4		-40	46.0667	7.67471	3	25.8099	3.48866	3
0	0.250773	0.0266011	4	0.875165	0.0371585	4	0.490812	0.0806051	4	0.724397	0.0895593	4		0				16.4306	2.62282	3
40	0.543091	0.0204431	4	1	0	4	0.75476	0.0683233	4	0.73509	0.100402	4		40				14.0322	2.46901	3
80	1	0	4	0.932862	0.0447651	4	1	0	4	1	0	4		80				10.0045	1.72561	3
R2C-qBBr:I287W	Charge (normalized)						Fluorescence (normalized)								Tau (single exponential fit to fluorescence) (ms)
	Activation			Deactivation			Activation			Deactivation					Deactivation			Activation
Voltage (mV)	mean	SEM	n	mean	SEM	n	mean	SEM	n	mean	SEM	n		Voltage (mV)	mean	SEM	n	mean	SEM	n
-160	0.0744672	0.0658502	4	0.0474536	0.0422956	5	0	0	4	0.0385462	0.0280362	5		-160	7.90143	1.90506	8
-120	0.00573475	0.00573475	4	0.0225141	0.0225141	5	0.0284008	0.00911982	4	0.0434928	0.027273	5		-120	11.9409	2.23498	8
-80	0.07714	0.0334014	4	0.296199	0.0944311	5	0.191356	0.0254872	4	0.491655	0.0350888	5		-80	16.4969	1.87729	8	21.1273	6.90578	3
-40	0.238653	0.0491201	4	0.583677	0.117034	5	0.679644	0.0702501	4	0.894477	0.0155694	5		-40	17.6589	1.58559	7	24.754	1.10189	4
0	0.480258	0.0677787	4	0.827078	0.0671151	5	0.994215	0.00578513	4	0.975679	0.00765828	5		0				21.4059	2.18099	4
40	0.721327	0.0644841	4	1	0	5	0.963747	0.0215064	4	0.992331	0.00443204	5		40				14.7557	0.893743	4
80	0.983303	0.0166973	4	0.924111	0.0406292	5	0.644712	0.0759085	4	0.977109	0.00433295	5		80				10.5823	1.35264	4
120	0.99686	0.00314021	4											120				8.58383	0.28383	2
160	0.69291	0.0345547	4											160				6.97525	0.60525	2
R2C-qBBr:Y415W	Charge (normalized)						Fluorescence (normalized)								Tau (single exponential fit to fluorescence) (ms)
	Activation			Deactivation			Activation			Deactivation					Deactivation			Activation
Voltage (mV)	mean	SEM	n	mean	SEM	n	mean	SEM	n	mean	SEM	n		Voltage (mV)	mean	SEM	n	mean	SEM	n
-160	0	0	3	0.260061	0.133557	3	0	0	3	0.260061	0.133557	3		-160	10.4371	2.27118	4
-120	0.251348	0.170725	3	0.0873623	0.0873623	3	0.251348	0.170725	3	0.0873623	0.0873623	3		-120	5.45712	1.46175	4
-80	0.497608	0.209496	3	0.529073	0.100292	3	0.497608	0.209496	3	0.529073	0.100292	3		-80	10.5094	4.21204	4	7.60962	0.594367	6
-40	0.702887	0.187799	3	0.824071	0.0570373	3	0.702887	0.187799	3	0.824071	0.0570373	3		-40				6.5899	1.43506	6
0	0.806828	0.0974429	3	0.938891	0.0351786	3	0.806828	0.0974429	3	0.938891	0.0351786	3		0				5.01612	1.12549	6
40	0.866034	0.0607285	3	0.979792	0.0120588	3	0.866034	0.0607285	3	0.979792	0.0120588	3		40				3.70189	0.437001	6
80	0.834943	0.165057	3	0.929531	0.0498765	3	0.834943	0.165057	3	0.929531	0.0498765	3		80				4.03542	0.847914	6
