# Supplementary material for: Tracking the movement of discrete gating charges in a voltage-gated potassium channel
Source: eLife. 2021 Nov 15;10:e58148. doi: 10.7554/eLife.58148 (PMC8635975; doi:10.7554/eLife.58148)
Supplement: Figure 6—figure supplement 2—source data 1. [file elife-58148-fig6-figsupp2-data1.xlsx]

## Sheet: Figure 6-supplement 2
R1C-qBBr:W454A;E247W	Charge (normalized)								Fluorescence (normalized)
Voltage (mV)	Activation			Relaxed				Voltage (mV)	Activation			Relaxed
	mean	SEM	n	mean	SEM	n			mean	SEM	n	mean	SEM	n
-160	0	0	4	0	0	4		-160	0.0180942	0.01645	8	0	0	6
-120	0.0890058	0.0101958	4	0.0089	0.0101958	4		-120	0.0629686	0.0110403	8	0.599697	0.0551643	6
-80	0.239985	0.00717618	4	0.594	0.00717618	4		-80	0.0955098	0.0204866	8	0.841054	0.0507638	6
-40	0.502344	0.0145932	4	0.825	0.0145932	4		-40	0.164295	0.0439349	8	0.886768	0.0384049	6
0	0.744216	0.00622832	4	0.952	0.00622832	4		0	0.444	0.0544761	8	0.946848	0.0215502	6
40	0.897751	0.0171939	4	1	0.0171939	4		40	0.724002	0.0344365	8	0.894698	0.0487755	6
80	1	0	4	0.926	0	4		80	1	0	8	0.891367	0.0520229	6
R1C-qBBr:W454A;T326W	Charge (normalized)								Fluorescence (normalized)
Voltage (mV)	Activation			Relaxed				Voltage (mV)	Activation			Relaxed
	mean	SEM	n	mean	SEM	n			mean	SEM	n	mean	SEM	n
-160	0.0457	0.0390481	5	0	0	4		-160	0.0703791	0.0162276	5	0	0	3
-120	0	0	5	0.157	0.0351072	4		-120	0.0279311	0.0192206	5	0.201411	0.0115916	3
-80	0.0248	0.0122999	5	0.556	0.034115	4		-80	0.0107853	0.00580453	5	0.329129	0.0616039	3
-40	0.11	0.028552	5	0.762	0.0202439	4		-40	0.0438137	0.020457	5	0.70921	0.0522292	3
0	0.288	0.0469923	5	0.906	0.00838392	4		0	0.291466	0.0108807	5	0.925929	0.00710807	3
40	0.583	0.0449378	5	1	0.00954046	4		40	0.649781	0.0184787	5	0.947795	0.0140747	3
80	1	0	5	0.986	0.0336471	4		80	1	0	5	1	0	3
