# Supplementary material for: Tracking the movement of discrete gating charges in a voltage-gated potassium channel
Source: eLife. 2021 Nov 15;10:e58148. doi: 10.7554/eLife.58148 (PMC8635975; doi:10.7554/eLife.58148)
Supplement: Figure 6—source data 1. [file elife-58148-fig6-data1.xlsx]

## Sheet: Figure 6
R1C-qBBr:W454A;E247W	Charge (normalized)						Fluorescence (normalized)								Tau (single exponential fit to fluorescence) (ms)
	Activation			Deactivation			Activation			Deactivation					Deactivation			Activation
Voltage (mV)	mean	SEM	n	mean	SEM	n	mean	SEM	n	mean	SEM	n		Voltage (mV)	mean	SEM	n	mean	SEM	n
-160	0	0	4	0	0	9	0.0180942	0.01645	4	0.0202938	0.0117176	9		-160	3.68647	0.609142	4
-120	0.0890058	0.0101958	4	0.146568	0.0349592	9	0.0629686	0.0110403	4	0.179164	0.0345758	9		-120	8.22156	2.54137	4
-80	0.239985	0.00717618	4	0.596264	0.0343013	9	0.0955098	0.0204866	4	0.61433	0.0261007	9		-80	16.4356	4.38176	4	8.72137	0.583119	3
-40	0.502344	0.0145932	4	0.847207	0.030146	9	0.164295	0.0439349	4	0.849904	0.0142931	9		-40	19.0096	0	1	13.0502	4.68115	3
0	0.744216	0.00622832	4	0.954438	0.0197236	9	0.444	0.0544761	4	0.945882	0.00735246	9		0				12.2527	2.33415	3
40	0.897751	0.0171939	4	1.00509	0.0114636	9	0.724002	0.0344365	4	0.98837	0.00471739	9		40				7.93726	1.17331	3
80	1	0	4	0.986271	0.00988957	9	1	0	4	0.961585	0.015557	9		80				5.15177	0.952718	3
R1C-qBBr:W454A;I320W	Charge (normalized)						Fluorescence (normalized)								Tau (weighted exponential fit to fluorescence) (ms)
	Activation			Deactivation			Activation			Deactivation					Deactivation			Activation
Voltage (mV)	mean	SEM	n	mean	SEM	n	mean	SEM	n	mean	SEM	n		Voltage (mV)	mean	SEM	n	mean	SEM	n
-160	0	0	4	0	0	5	0.0215637	0.0156565	4	0.0316861	0.0316861	5		-160	2.22512	0.427399	5
-120	0.311372	0.0201347	4	0.342117	0.0560669	5	0.10911	0.0291461	4	0.314475	0.132453	5		-120	4.68491	1.44422	5
-80	0.61731	0.0616017	4	0.751025	0.0266233	5	0.324954	0.126454	4	0.579455	0.0793897	5		-80	5.63538	2.17263	5	6.93475	0.34475	2
-40	0.900941	0.0537318	4	0.914742	0.018125	5	0.436186	0.0863898	4	0.655293	0.157239	5		-40	22.2567	7.22378	3	3.94515	0.705145	2
0	0.975395	0.0246052	4	0.974361	0.00878926	5	0.572802	0.120091	4	0.803693	0.069391	5		0				3.56975	1.53248	3
40	0.814149	0.160831	4	1	0	5	0.765827	0.0875242	4	0.752556	0.0559967	5		40				3.45289	1.16147	3
80	0.844099	0.0868782	4	0.970013	0.00813524	5	0.967751	0.0322492	4	0.807642	0.110089	5		80				2.66786	0.834852	3
R1C-qBBr:W454A;T326W	Charge (normalized)						Fluorescence (normalized)								Tau (weighted exponential fit to fluorescence) (ms)
	Activation			Deactivation			Activation			Deactivation					Deactivation			Activation
Voltage (mV)	mean	SEM	n	mean	SEM	n	mean	SEM	n	mean	SEM	n		Voltage (mV)	mean	SEM	n	mean	SEM	n
-160	0.0457	0.0390481	5	0	0	5	0.0703791	0.0162276	5	0.144169	0.0409827	5		-160	0.697723	0.141884	3
-120	0	0	5	0.25433	0.0417002	5	0.0279311	0.0192206	5	0.151912	0.130697	5		-120	1.64934	0.319836	3
-80	0.0248	0.0122999	5	0.671318	0.0423475	5	0.0107853	0.00580453	5	0.0552818	0.0198981	5		-80	4.246	0.740027	3
-40	0.11	0.028552	5	0.913399	0.0133471	5	0.0438137	0.020457	5	0.417662	0.0356807	5		-40	4.93026	1.34118	3	31.5532	8.90521	3
0	0.288	0.0469923	5	0.981613	0.00720646	5	0.291466	0.0108807	5	0.751397	0.065271	5		0	5.18336	0.45556	2	16.6656	3.65865	3
40	0.583	0.0449378	5	0.994489	0.00551088	5	0.649781	0.0184787	5	0.809206	0.10287	5		40				8.05474	0.452626	3
80	1	0	5	0.960119	0.0189304	5	1	0	5	0.926681	0.0661594	5		80				5.90499	1.11881	3
