# Supplementary material for: Tracking the movement of discrete gating charges in a voltage-gated potassium channel
Source: eLife. 2021 Nov 15;10:e58148. doi: 10.7554/eLife.58148 (PMC8635975; doi:10.7554/eLife.58148)
Supplement: Figure 7—source data 1. [file elife-58148-fig7-data1.xlsx]

## Sheet: Figure 7
R1C-qBBr:W454A;F290W	Tau (weighted exponential fit to fluorescence) (ms)
Depolarization (ms)	mean	SEM	n
80	5.1575	0.915736	4
1000	10.118	2.24556	5
5000	9.2	2.11831	4
