# Supplementary material for: Tracking the movement of discrete gating charges in a voltage-gated potassium channel
Source: eLife. 2021 Nov 15;10:e58148. doi: 10.7554/eLife.58148 (PMC8635975; doi:10.7554/eLife.58148)
Supplement: Figure 8—source data 1. [file elife-58148-fig8-data1.xlsx]

## Sheet: Figure 8
CiVSP R217Q R1C	Fluorescence (normalized)
Voltage (mV)	mean	SEM	n
-120	0.0092	0.0052	4
-100	0.0236	0.0236	4
-80	0.0607	0.0452	4
-60	0.1023	0.0534	4
-40	0.1613	0.0515	4
-20	0.2533	0.0294	4
0	0.3662	0.0161	4
20	0.5055	0.044	4
40	0.6549	0.0636	4
60	0.7726	0.0857	4
80	0.8899	0.0618	4
100	0.9636	0.0349	4
120	0.9839	0.0112	4
CiVSP R217Q R1C Y206A	Fluorescence (normalized)
Voltage (mV)	mean	SEM	n
-120	0.1971	0.1043	3
-100	0.0531	0.0292	3
-80	0.0139	0.0067	3
-60	0.0132	0.012	3
-40	0.0495	0.0322	3
-20	0.1719	0.0271	3
0	0.3336	0.0333	3
20	0.585	0.0197	3
40	0.7983	0.0078	3
60	0.974	0.0133	3
80	0.9847	0.0153	3
100	0.95	0.0162	3
120	0.8624	0.0426	3
