# Supplementary material for: Tracking the movement of discrete gating charges in a voltage-gated potassium channel
Source: eLife. 2021 Nov 15;10:e58148. doi: 10.7554/eLife.58148 (PMC8635975; doi:10.7554/eLife.58148)
Supplement: Figure 9—source data 1. [file elife-58148-fig9-data1.xlsx]

## Sheet: Figure 9
R1C-qBBr	Tau (slow component of double			Tau (fast component of double			Tau (single exponential fit
	exponential fit to gating current) (ms)			exponential fit to gating current) (ms)			to fluorescence) (ms)
Voltage (mV)	mean	SEM	n	mean	SEM	n	mean	SEM	n
80	0.770714	0.248682	4	0.269635	0.0897483	4	4.73247	1.09249	4
40	3.30021	1.10252	4	1.44188	0.565079	4	7.66561	1.97365	4
20	4.45444	0.724815	4	0.857013	0.436317	4	5.48412	0.35686	4
0	9.47325	0.91593	4	1.61858	0.238246	4	11.7088	2.01287	4
-20	8.49692	2.24628	4	1.19833	0.669493	4	12.7956	3.18179	4
-40	12.3495	1.26921	4	1.82214	0.344998	4	19.7069	4.37664	4
-60	3.45992	2.41776	4	0.634833	0.506737	4	19.7001	1.87625	4
R1C-qBBr:W454A;E247W	Tau (slow component of double			Tau (fast component of double			Tau (single exponential fit
	exponential fit to gating current) (ms)			exponential fit to gating current) (ms)			to fluorescence) (ms)
Voltage (mV)	mean	SEM	n	mean	SEM	n	mean	SEM	n
80	3.93498	2.42255	4	3.23745	2.37732	4	5.15177	0.952718	3
40	11.035	3.263	4	1.48003	0.544293	4	7.93726	1.17331	3
0	17.3744	0.434567	4	2.50021	0.243682	4	12.2527	2.33415	3
-40	17.2201	0.424939	4	2.51892	0.279996	4	13.0502	4.68115	3
-80	13.0823	0.763577	4	2.14224	0.193821	4	8.7366	0.575475	3
